# Supplementary material for: Colistin dampens fibrinolysis and endothelial activation during endotoxaemia: A randomised, double blind trial
Source: PubMed Central journal article supplement — Thromb Haemost. 2017 Nov 28;117(9):1714–21. doi: 10.1160/TH17-03-0196 (PMC6292133; doi:10.1160/th17-03-0196), 2017-11-28
Supplement: 10-1160-th17-03-0196-supp.pdf [file 10-1160-th17-03-0196-supp.pdf]

Supplementary Material to Schoergenhofer et al. “Colistin dampens fibrinolysis and endothelial activation during endotoxaemia. A randomised, double blind trial”  
(<https://doi.org/10.1160/TH17-03-0196>)

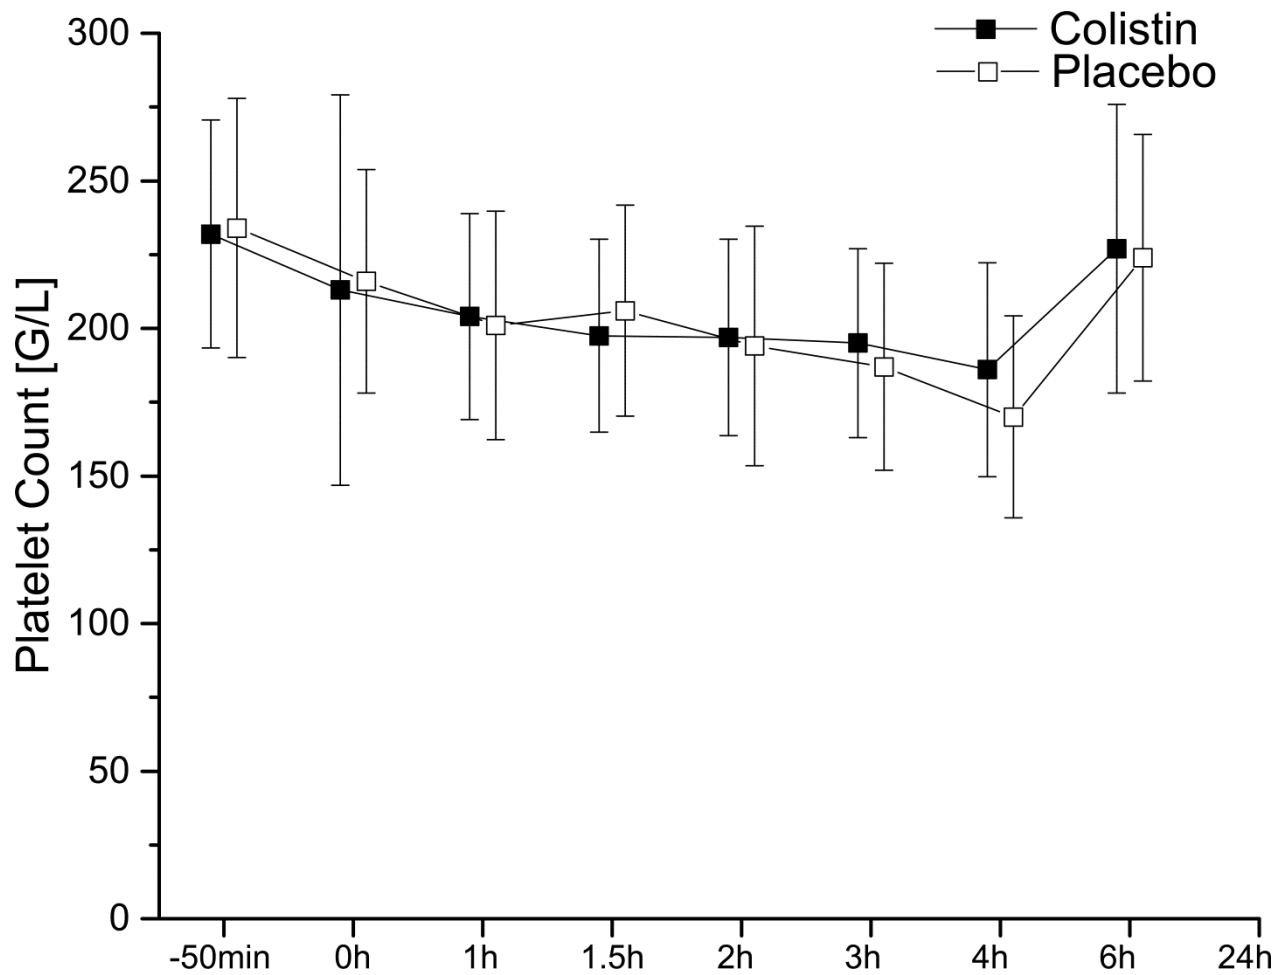

Suppl. Figure 1: Platelet counts between after infusion of 2 ng/kg bodyweight and colistin or placebo. Presented are means  $\pm$  95 % CI. No difference was detected. N = 15.
